# Supplementary material
Source: PubMed Central journal article supplement (PMC8202968)
Supplement: NIHMS1701414-supplement-Supple_appendix.pdf [file NIHMS1701414-supplement-Supple_appendix.pdf]

## Supplementary Appendix

This appendix has been provided by the authors to give readers additional information about their work.

## Supplementary Appendix

### Table of Contents

|                                                                                                                                      |    |
|--------------------------------------------------------------------------------------------------------------------------------------|----|
| Collaborators.....                                                                                                                   | 3  |
| Additional Methods.....                                                                                                              | 4  |
| Additional Results.....                                                                                                              | 8  |
| Figure S1. CONSORT Diagram.....                                                                                                      | 9  |
| Figure S2. Time to Recovery of Grade 3/4 Cytopenias.....                                                                             | 9  |
| Figure S3. Subgroup Analysis of Cytokine Release Syndrome.....                                                                       | 11 |
| Figure S4. Median Ferritin and C-Reactive Protein Levels by Cytokine Release Syndrome Severity...                                    | 12 |
| Figure S5. Post-Infusion Values of Ferritin and C-Reactive Protein.....                                                              | 13 |
| Figure S6. Peak Vector Transgene Copies in Patients With and Without Cytokine<br>Release Syndrome.....                               | 14 |
| Figure S7. Effect of Baseline Serum and Tumor B-Cell Maturation Antigen Levels on Response.....                                      | 15 |
| Figure S8. Changes From Baseline in Serum Monoclonal Protein, Free Light Chains, and<br>B-Cell Maturation Antigen.....               | 16 |
| Figure S9. Clearance in Bone Marrow by Immunohistochemistry and Tumor Burden Reduction<br>by PET Imaging in Individual Patients..... | 18 |
| Figure S10. Correlation Between CAR+ CD4/CD8 T Cell Ratio in the Final Product and at Peak<br>Expansion.....                         | 19 |
| Figure S11. Vector Transgene Copy AUC <sub>0-28d</sub> in Patients With and Without a Response.....                                  | 20 |
| Table S1. International Myeloma Working Group Uniform Response Criteria.....                                                         | 21 |
| Table S2. Bridging Therapies Received From Leukapheresis to Lymphodepletion.....                                                     | 23 |
| Table S3. Additional Baseline Characteristics of the Safety Population.....                                                          | 24 |
| Table S4. Adverse Events, Including Symptoms of Cytokine Release Syndrome.....                                                       | 26 |
| Table S5. Adverse Events and Cytokine Release Syndrome From Week 8 Through Month 6.....                                              | 27 |
| Table S6. Characteristics and Management of Cytokine Release Syndrome.....                                                           | 28 |
| Table S7. Adverse Events Considered Symptoms of Cytokine Release Syndrome.....                                                       | 29 |
| Table S8. Characteristics and Management Neurotoxicities.....                                                                        | 31 |
| Table S9. Tumor Response by Baseline Characteristics.....                                                                            | 32 |
| Table S10. CAR T Cell Persistence Over Time.....                                                                                     | 34 |
| References.....                                                                                                                      | 35 |

## **CRB-401 Study Investigators**

Noopur Raje  
Massachusetts General Hospital Cancer Center

Jesus Berdeja  
Sarah Cannon Research Institute and Tennessee Oncology

Yi Lin  
Mayo Clinic

David Siegel  
Hackensack University Medical Center

Sundar Jagannath  
Mount Sinai Medical Center

Deepu Madduri  
Mount Sinai Medical Center

Michaela Liedtke  
Stanford University Medical Center

Jacalyn Rosenblatt  
Beth Israel Deaconess Medical Center

Marcela Maus  
Massachusetts General Hospital Cancer Center

Nikhil Munshi  
Dana-Farber Cancer Institute

James N. Kochenderfer  
Experimental Transplantation and Immunology Branch  
National Cancer Institute/National Institutes of Health

## **METHODS**

### ***Study Design***

The study consisted of a dose escalation and expansion phase. A minimum of 3 patients were enrolled in each dose escalation cohort (50, 150, 450, and  $800 \times 10^6$  CAR+ T cells) with expansion to a minimum of 6 patients in the event of a dose-limiting toxicity. At the discretion of the Safety Review Committee, dose escalation cohorts were expanded or divided into independent groups based on low vs high tumor burden (< vs  $\geq 50\%$  bone marrow plasma cells). The expansion phase evaluated a dose range of 150 to  $450 \times 10^6$  CAR+ T cells and explored activity in patients with low tumor B-cell maturation antigen (BCMA) expression (<50% BCMA expression in CD138+ cells). The full protocol is available with the full text of this article at NEJM.org

### ***End Points and Assessments***

Primary outcome measures were incidence of adverse events graded according to the National Cancer Institute Common Terminology Criteria for Adverse Events (NCI CTCAE) version 4.03 ([https://evs.nci.nih.gov/ftp1/CTCAE/CTCAE\\_4.03/CTCAE\\_4.03\\_2010-06-14\\_QuickReference\\_5x7.pdf](https://evs.nci.nih.gov/ftp1/CTCAE/CTCAE_4.03/CTCAE_4.03_2010-06-14_QuickReference_5x7.pdf)), abnormal laboratory test results, and dose-limiting toxicities as defined below. Secondary outcome measures include disease-specific response criteria (including complete response, very good partial response, and partial response according to the International Myeloma Working Group Uniform Response Criteria for Multiple Myeloma) and measurement of tumor BCMA expression by immunohistochemistry performed locally as previously described.<sup>28</sup> The exploratory end point progression-free survival was defined as the time from bb2121 infusion to the date of either the first observation of progressive disease or occurrence of death due to any cause, whichever occurred first. Duration of response was defined as the time, in months, from when response criteria were first met for a partial response or better to the first date the criteria for disease progression were met or the patient died due to any cause, whichever occurred first. Time

to recovery of grade 3/4 cytopenia was defined as the time, in weeks, from first occurrence of a grade 3/4 event to the first date when recovery criteria were met.

### ***Dose-Limiting Toxicities***

Dose-limiting toxicities are defined as any bb2121-related grade  $\geq 3$  toxicity occurring within the 21 days after infusion, with the following exceptions:

- Grade  $\leq 3$  cytokine release syndrome that responds to appropriate medical intervention within 3 days and recovers to grade  $\leq 2$
- Grade  $\leq 3$  neurotoxicity lasting  $< 3$  days that recovers to grade  $\leq 2$
- Grade  $\leq 4$  tumor lysis syndrome lasting  $< 7$  days
- Grade  $\leq 3$  neutropenia of any duration or grade 4 neutropenia lasting  $< 28$  days
- Grade  $\leq 3$  anemia of any duration or grade 4 anemia lasting  $< 28$  days
- Grade  $\leq 3$  thrombocytopenia of any duration or grade 4 thrombocytopenia lasting  $< 28$  days
- All cytopenias except neutropenia, anemia, and thrombocytopenia as described above
- Fever of any grade, including febrile neutropenia
- Grade  $\leq 3$  diarrhea lasting  $< 72$  hours
- Grade  $\leq 3$  nausea and/or vomiting lasting  $< 72$  hours
- Grade  $\leq 3$  fatigue lasting  $< 7$  days
- Grade  $\leq 4$  transaminase, bilirubin, creatinine kinase, blood urea nitrogen, or creatinine elevation lasting  $< 7$  days
- Asymptomatic lipase elevation in the absence of any clinical signs or symptoms of pancreatitis
- Any nonhematologic grade 3 clinical laboratory AE that is asymptomatic and rapidly reversible (returns to baseline or to grade  $\leq 2$  within 7 days).

Grade 3/4 adverse events related to bb2121 occurring after the first 21 days after infusion will be assessed by the Safety Review Committee and considered in decisions regarding the maximum tolerated dose and recommended part two dose. Dosing of another subject or escalation to a higher dose level will be delayed if qualification of an ongoing toxicity as a dose-limiting toxicity is pending.

### ***Cellular Kinetics Assay***

Copies of vector transgene per micrograms genomic DNA was determined by quantitative PCR (qPCR). Briefly, CD3+ cells were isolated to high purity from whole blood collected in a K2-EDTA tube, using Miltenyi whole blood CD3 human microbeads (Miltenyi Biotec). CD3+ cell purity was determined after analysis by flow cytometry using hCD3-BV510 (Biolegend®). Genomic DNA from the purified CD3+ cell pellet was extracted using a Nucleospin Blood QuickPure® kit (Takara Bio USA), and DNA concentration was determined by a Qubit™ double-stranded DNA Broad Range Assay kit and Qubit™ 3.0 Fluorometer (Life Technologies). One hundred ng of purified CD3+ DNA was included in the qPCR reaction for specific quantification of the bb2121 transgene (*Psi-gag*), and a reference housekeeping gene (*RNaseP*). Detection and quantification of the *Psi-Gag* sequence and *RNaseP* was achieved using target-specific oligonucleotide primers and dual-labeled oligonucleotide hydrolysis probes as previously described.<sup>28</sup> The amplified targets were detected in real time by the Stratagene Mx3005P instrument using TaqMan® Universal PCR Master Mix, no UNG (Thermo Fisher Scientific), and quantified using a standard curve. Quantified copies of vector transgene per reaction is reported as copies per standardized input DNA (100 ng). Fluorescence data was analyzed using MxPro software.

Primer probe sequences:

- *Psi-Gag* forward primer (Sigma or Integrated DNA Technologies) custom synthesis,  
Sequence 5' to 3': GGA GCT AGA ACG ATT CGC AGT TA
- *Psi-Gag* reverse primer (Sigma or Integrated DNA Technologies) custom synthesis,  
Sequence 5' to 3': GGT TGT AGC TGT CCC AGT ATT TGT C

- *Psi-Gag* dual-labeled oligonucleotide [robe (5'-FAM, 3'-BHQ-1) (Biosearch Technologies or Integrated DNA Technologies) custom synthesis, Sequence 5' to 3': FAM/ACA GCC TTC TGA TGT CTC TAA AAG GCC AGG/BHQ-1
- TaqMan RNaseP Copy Number Reference Assay (Thermo Fisher Scientific)

### ***Pharmacokinetics Flow Assay***

The presence of anti-BCMA CAR+ CD4 and CD8 T cells was determined in anti-coagulated peripheral whole blood containing EDTA. Briefly, 100 µL of whole blood was added to TruCOUNT™ tubes (BD Biosciences) and incubated with anti-CD3-APC, anti-CD4-BV510, anti-CD8-BV421, and anti-CD45-FITC antibodies (Biolegend) as well as the anti-CAR reagent, recombinant human BCMA (rhBCMA), conjugated to phycoerythrin (PE)-labeled immunoglobulin Fc (rhBCMA-Ig Fc-PE) for 30 to 35 minutes at 2–8 °C. During the last 5 to 10 minutes of antibody incubation, 7-AAD (Biolegend) was added. Red blood cells were then lysed using 1× FACS lysing solution (BD Biosciences) for 10 to 15 minutes at room temperature. Samples were acquired on a BD FACSCanto II™ cell analyzer (BD Biosciences) and analyzed using BD FACSDIVA™ software (BD Biosciences). Fluorescence Minus One controls were used for placement of gates. The percent of CD4+ and CD8+ cells of live CD45+CD3+CAR+ cells is reported.

### ***Characterization of the bb2121 Drug Product***

The bb2121 drug product was characterized for the proportion of CAR+ CD4 and CD8 T cells by flow cytometry as part of the quality control release criteria. Briefly, samples were thawed and washed. The cells were then incubated with anti-CD8 fluorescein isothiocyanate, anti-CD45 PerCP-Cy5.5, anti-CD4 PE-Cy7, and anti-CD3-APC antibodies (BD Biosciences) as well as rhBCMA-Ig Fc-PE for 20 to 40 minutes at 2–8 °C. Following a wash step, cells were labeled with the LIVE/DEAD® Fixable Near-IR Dead Cell Stain Kit (Molecular Probes) for 20 to 40 minutes at 2–8 °C according to the manufacturer's instructions to exclude dead cells. Fluorescence Minus One controls were used for

placement of gates. Samples were acquired on a BD FACSCanto II™ cell analyzer (BD Biosciences) and analyzed using FlowJo™ Single Cell Analysis Software v9.0 (FlowJo, LLC). The percent of CD4+ and CD8+ cells of CD45+CD3+ CAR+ cells is reported.

## **RESULTS**

Patients were to receive lymphodepletion with fludarabine 30 mg/m<sup>2</sup>/day and cyclophosphamide 300 mg/m<sup>2</sup>/day before infusion of bb2121 on day 0. However, 7 patients had protocol-specified dose reduction of fludarabine to 24 mg/ m<sup>2</sup>/day based on renal function and 1 patient received no fludarabine as a planned deviation based on creatinine clearance <30 mL/min for which approval of the Food and Drug Administration was received ahead of time.



Figure S1. CONSORT Diagram

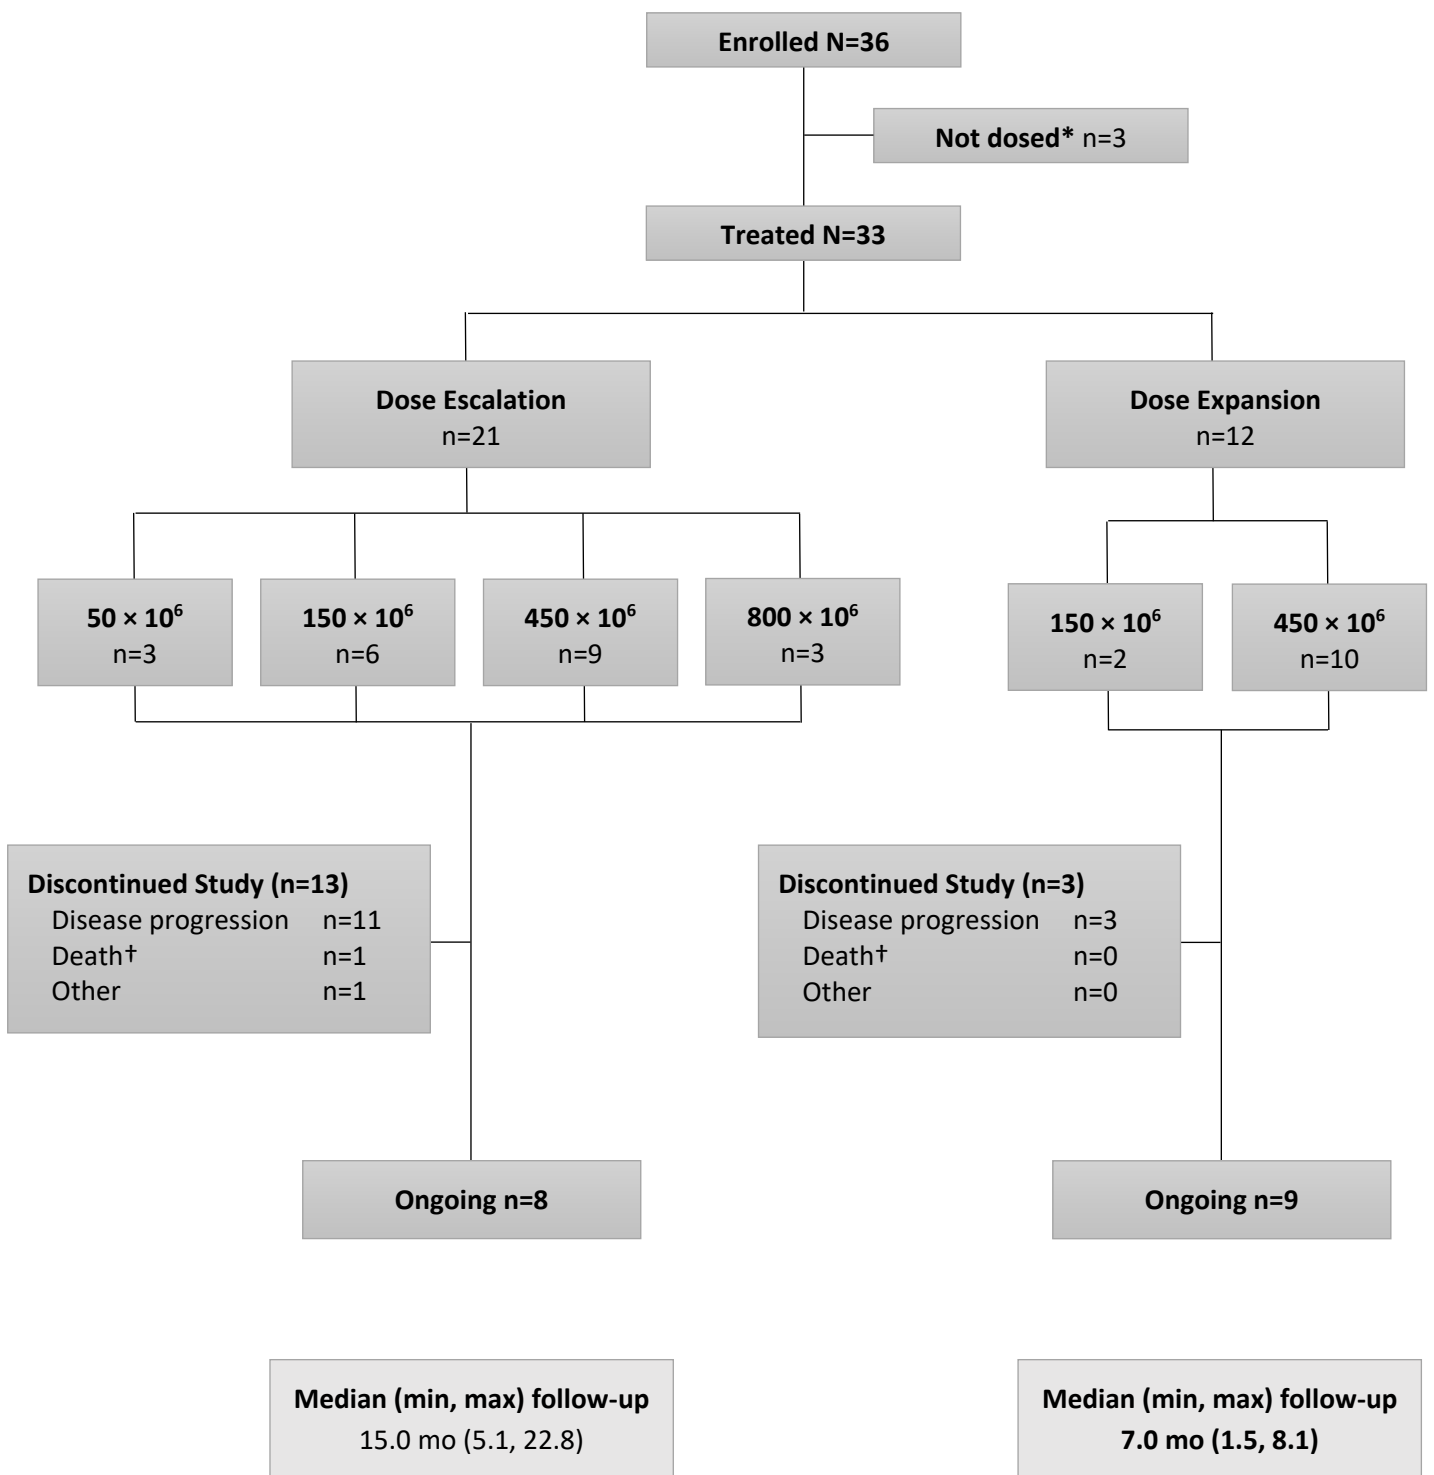

\*Three patients underwent leukapheresis but discontinued before initial bb2121 infusion.

†Six additional patients died during the long-term follow-up study owing to disease progression.

**Figure S2. Time to Recovery of Grade 3/4 Cytopenias.** Patients with grade 3/4 cytopenias (absolute neutrophil counts <1000 cells/ $\mu$ L or platelets <50,000/ $\mu$ L based on laboratory values) on or before month 1 are included. Recovery is defined as absolute neutrophil counts  $\geq$ 1000 cells/ $\mu$ L and platelets  $\geq$ 50,000 cells/ $\mu$ L. Time to recovery is defined as the time from infusion to the first time when recovery criteria were met. Median and 95% CI are from Kaplan-Meier estimates.

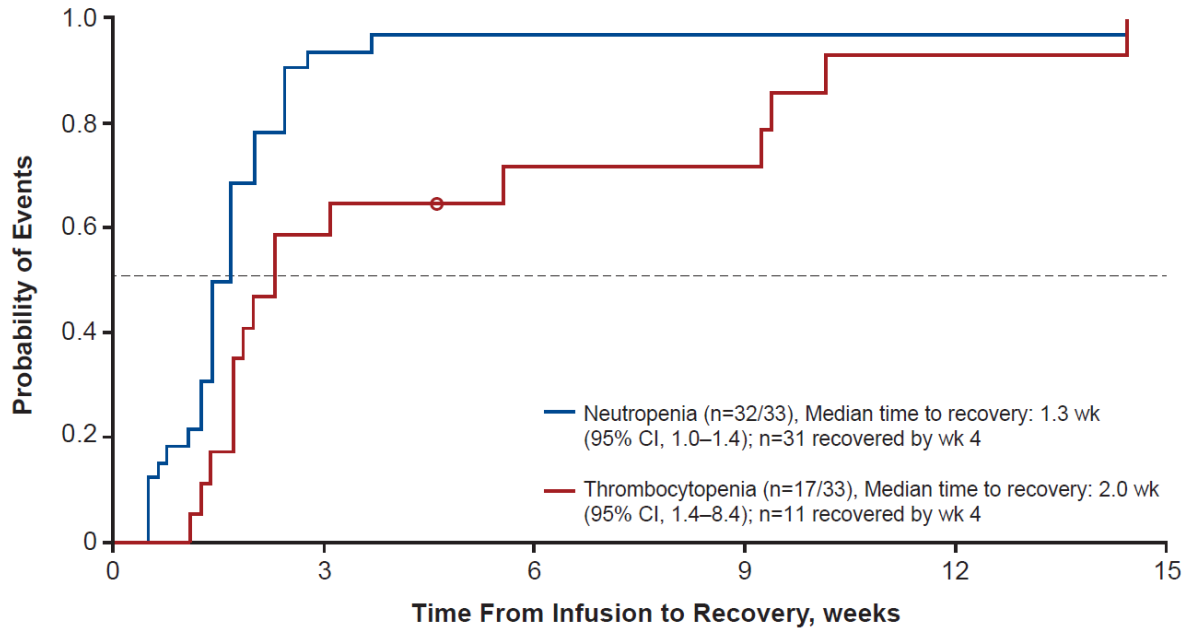

**Figure S3. Subgroup Analysis of Cytokine Release Syndrome.** AUC<sub>0-28d</sub> denotes area under the curve during the first 28 days after infusion, BCMA B-cell maturation antigen, C<sub>max</sub> maximum concentration, CRP C-reactive protein, CRS cytokine release syndrome, FLC, free light chain, IFN interferon, M monoclonal, TNF tumor necrosis factor. \*One patient dosed at 205 × 10<sup>6</sup> CAR T cells is included in the 450 × 10<sup>6</sup> dose group. †Bridging therapy between leukapheresis and lymphodepletion. ‡High tumor burden was defined as ≥50% CD138-positive cells by central laboratory analysis (first preference) or by local analysis of bone marrow plasma cells (second preference). In the absence of both, tumor burden was determined by the Safety Review Committee. §Involved free light chain (FLC) was defined as the higher value between κ-FLC and λ-FLC at baseline if the ratio was abnormal or by immunofixation if the ratio was normal. For results below detection limits, κ-FLC and λ-FLC values were set to 1.3 mg/L and 1.7 mg/L, respectively.

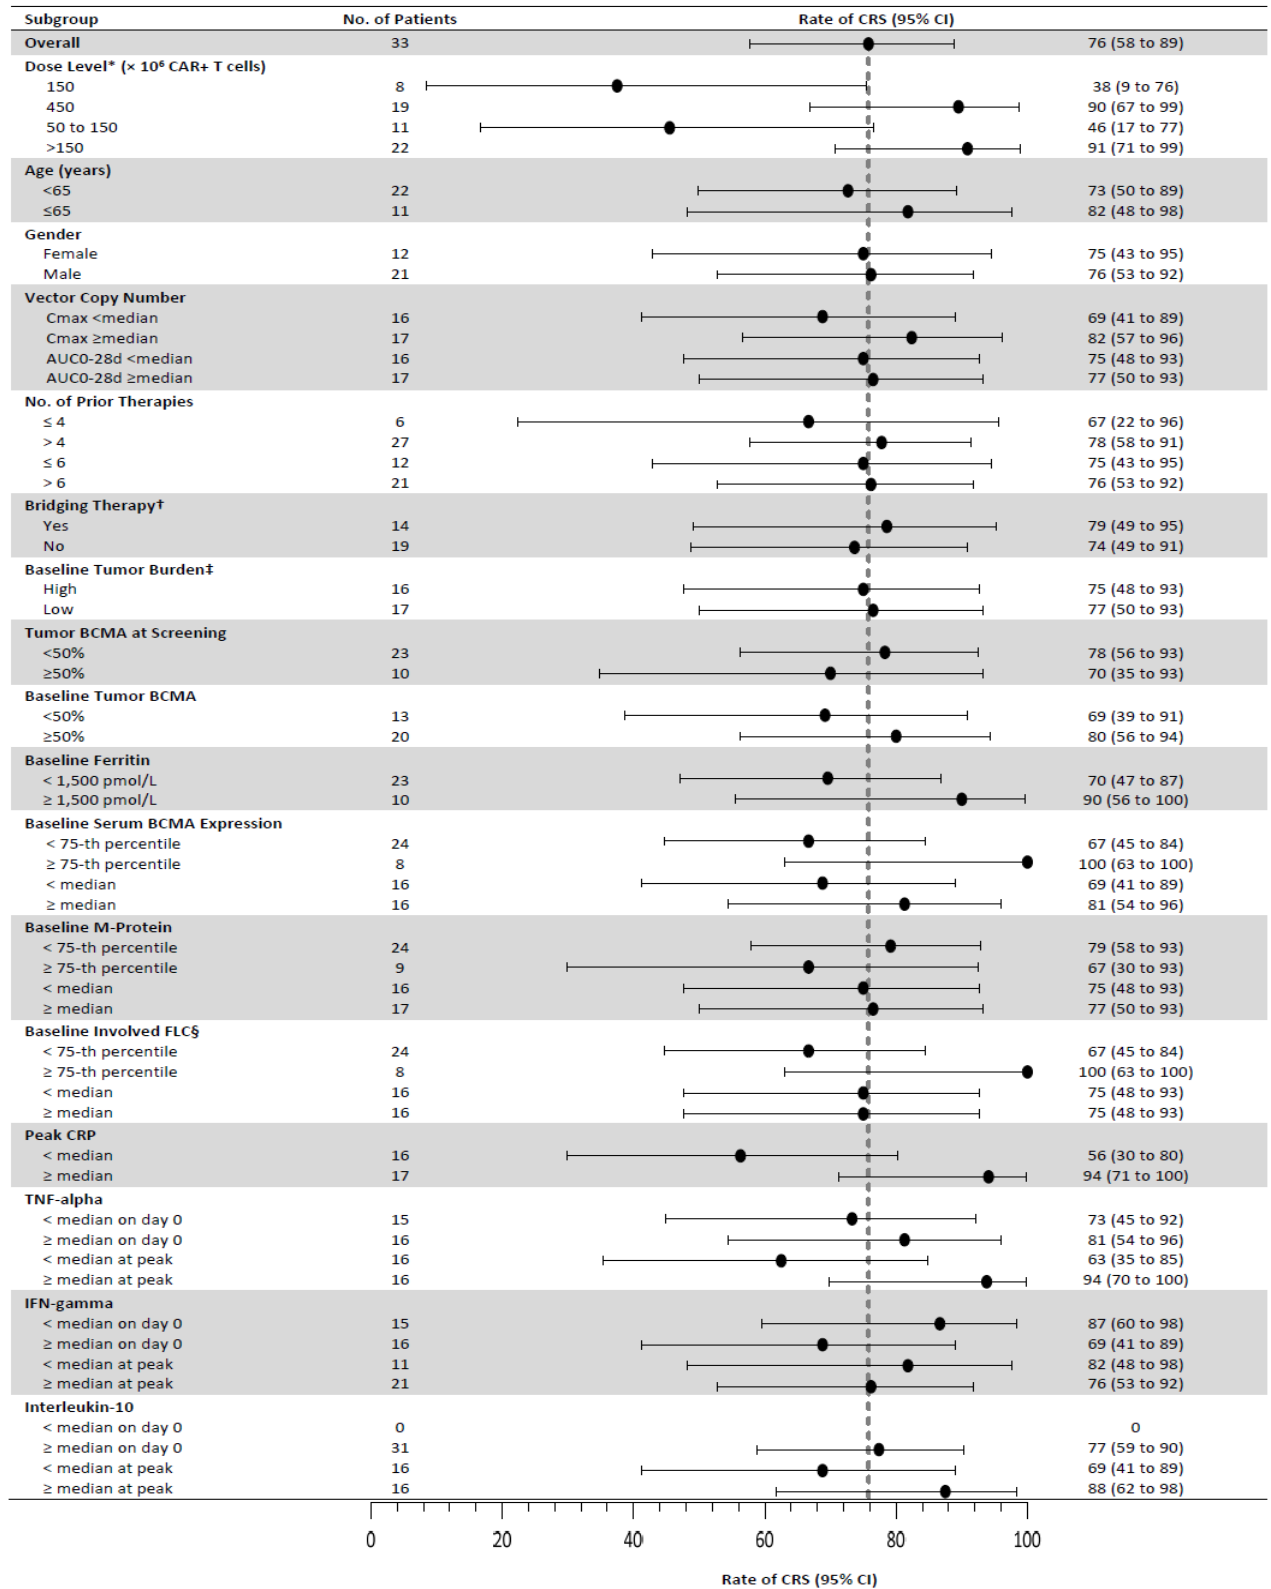

**Figure S4. Median Ferritin (A) and C-Reactive Protein (B) Levels by Cytokine Release Syndrome Severity.** Data are presented in patients without any CRS events (no CRS), patients with grade 1 CRS (Grade 1), and patients with grade 2 or higher CRS (grade  $\geq 2$ ). P values by the Kruskal-Wallis test. CRS denotes cytokine release syndrome.

**A) Ferritin Levels**

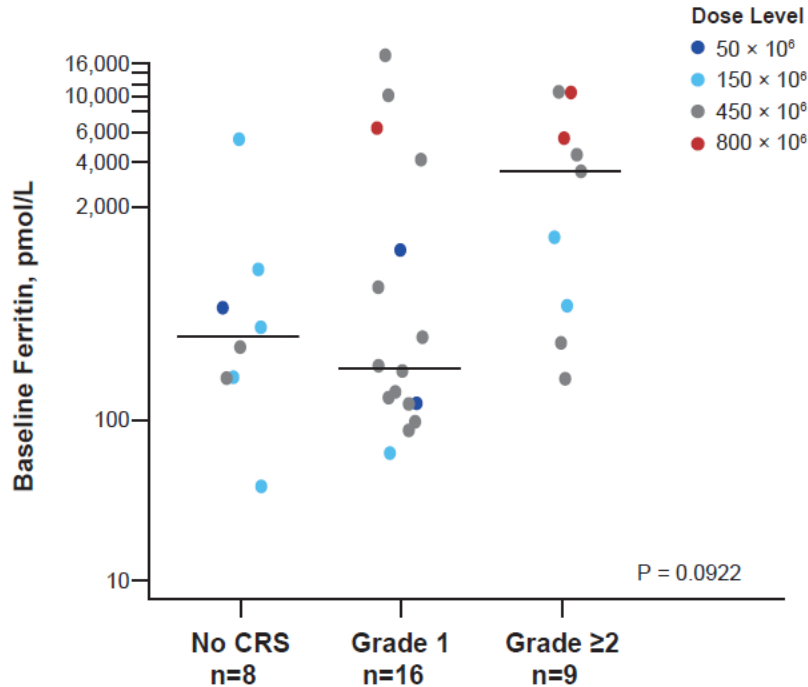

**B) C-Reactive Protein**

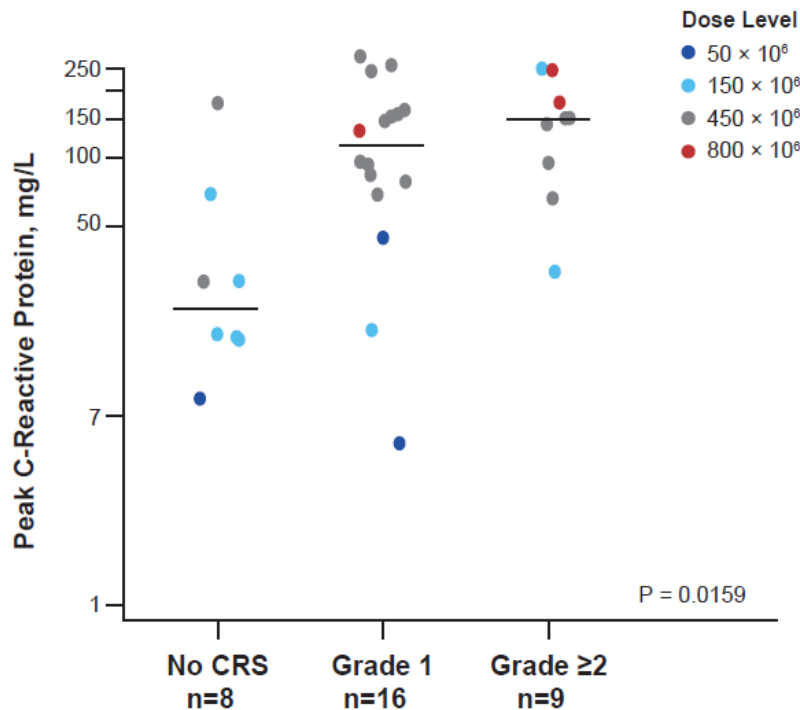

**Figure S5. Post-Infusion Values of Ferritin (A) and C-Reactive Protein (B).** Points represent median values and error bars represent interquartile ranges (Q1 and Q3). CRS denotes cytokine release syndrome, Toci tocilizumab.

**A. Ferritin**

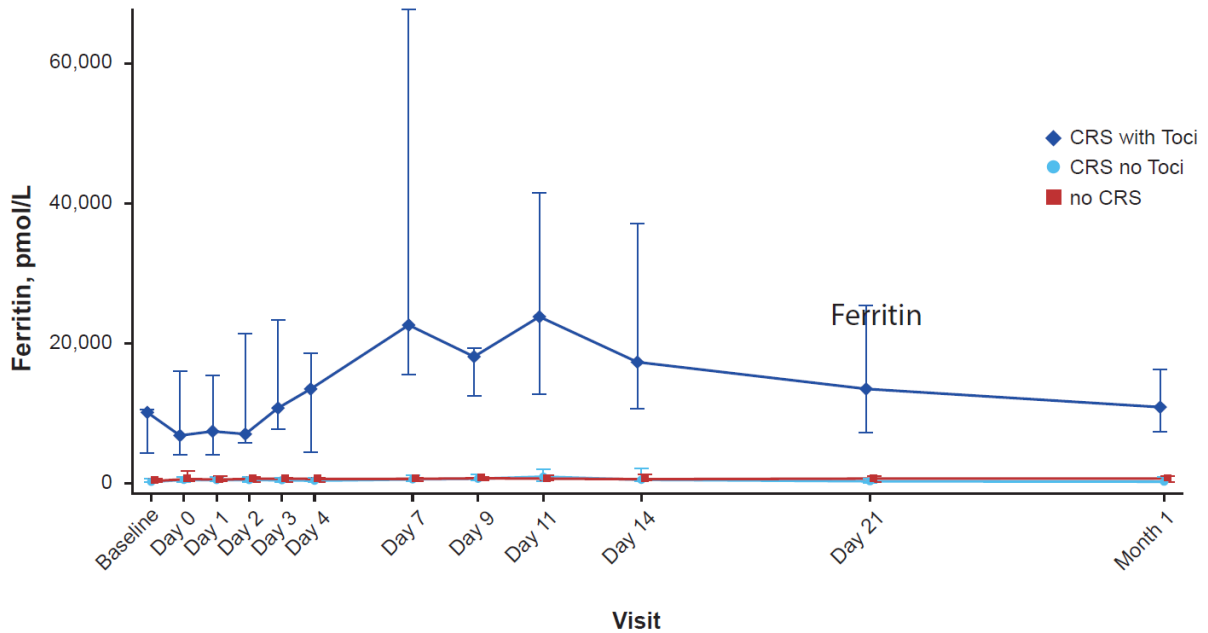

**No. of patients:**

|               | Baseline | Day 0 | Day 1 | Day 2 | Day 3 | Day 4 | Day 7 | Day 9 | Day 11 | Day 14 | Day 21 | Month 1 |
|---------------|----------|-------|-------|-------|-------|-------|-------|-------|--------|--------|--------|---------|
| CRS with Toci | 7        | 6     | 7     | 6     | 6     | 7     | 6     | 4     | 5      | 7      | 6      | 6       |
| CRS no Toci   | 18       | 17    | 17    | 18    | 18    | 17    | 18    | 18    | 16     | 18     | 16     | 17      |
| No CRS        | 8        | 8     | 8     | 7     | 7     | 7     | 7     | 7     | 7      | 7      | 7      | 7       |

**B. C-Reactive Protein**

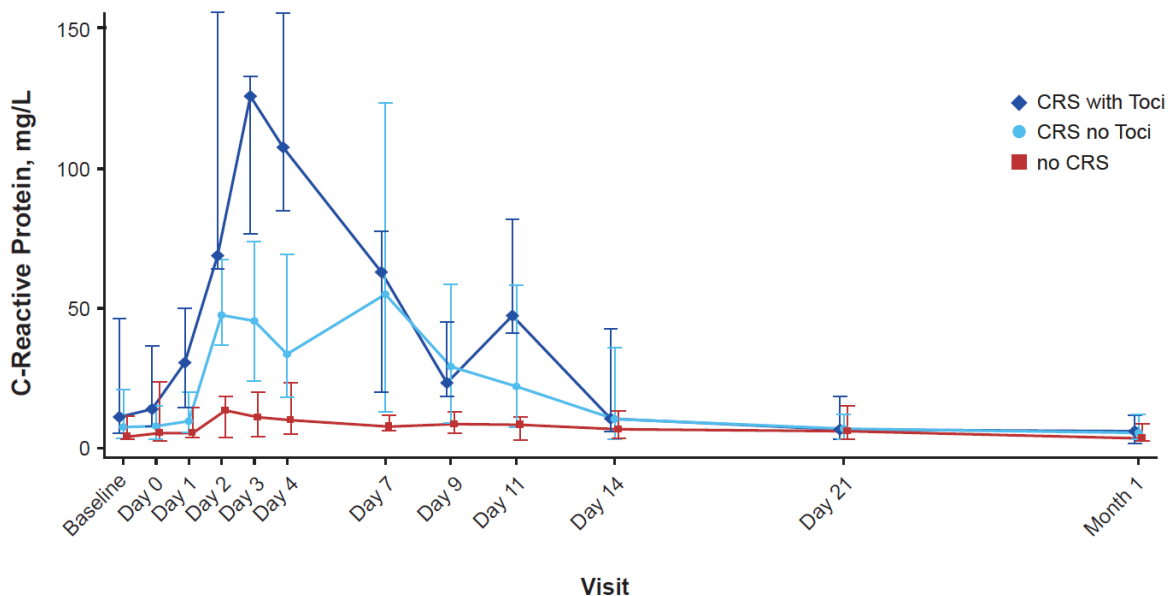

**No. of patients:**

|               | Baseline | Day 0 | Day 1 | Day 2 | Day 3 | Day 4 | Day 7 | Day 9 | Day 11 | Day 14 | Day 21 | Month 1 |
|---------------|----------|-------|-------|-------|-------|-------|-------|-------|--------|--------|--------|---------|
| CRS with Toci | 7        | 7     | 6     | 7     | 7     | 7     | 7     | 6     | 5      | 3      | 6      | 6       |
| CRS no Toci   | 18       | 18    | 17    | 18    | 18    | 18    | 18    | 18    | 18     | 18     | 17     | 18      |
| No CRS        | 8        | 8     | 8     | 8     | 8     | 8     | 8     | 8     | 8      | 8      | 8      | 8       |

**Figure S6. Peak Vector Transgene Copies in Patients With and Without CRS Treated with Tocilizumab (A) or Steroids (B).** Peak vector transgene copies per microgram genomic DNA in CD3-enriched peripheral blood from patients with cytokine release syndrome (CRS) managed with tocilizumab (CRS with Toci) or steroids (CRS with Steroids), CRS that did not prompt tocilizumab treatment (CRS no Toci) or steroid treatment (CRS no Steroids), and patients without any CRS events (no CRS). Bars indicate medians. P values are by the Kruskal-Wallis test.

A)

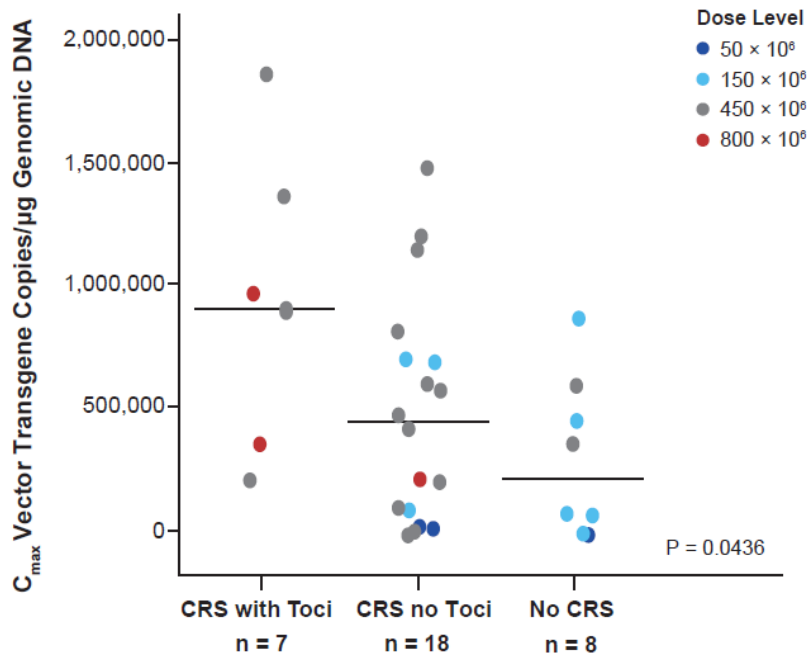

B)

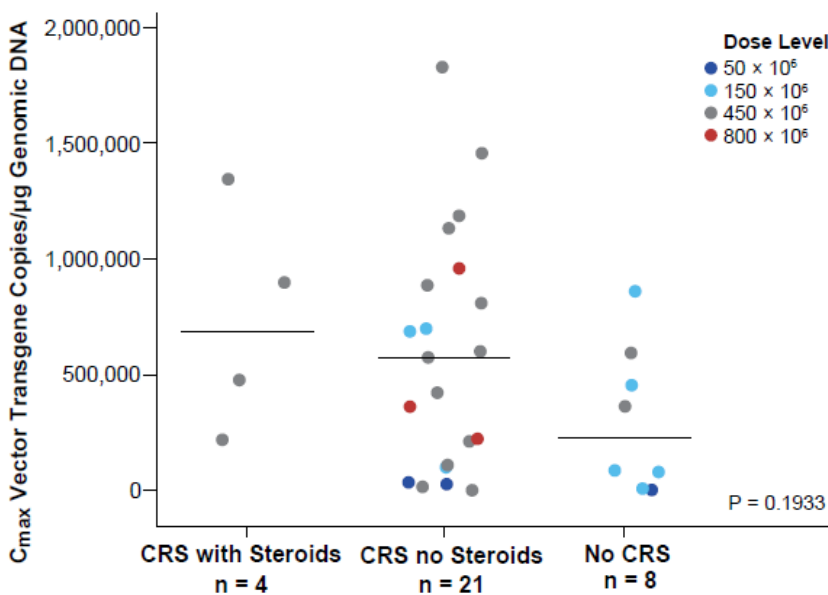

**Figure S7. Effect of Baseline Serum (A) and Tumor (B) B-Cell Maturation Antigen Levels on Response.** Responder is defined as having a best reponse of partial response or better. Others include those who did not achieve a partial response and those without a post-baseline response assessment. Lines indicate medians. P values are based on 2-sided Wilcoxon rank sum test. BCMA denotes B-cell maturation antigen. Baseline is defined as the last value before start of lymphodepletion.

**A. Baseline Serum BCMA**

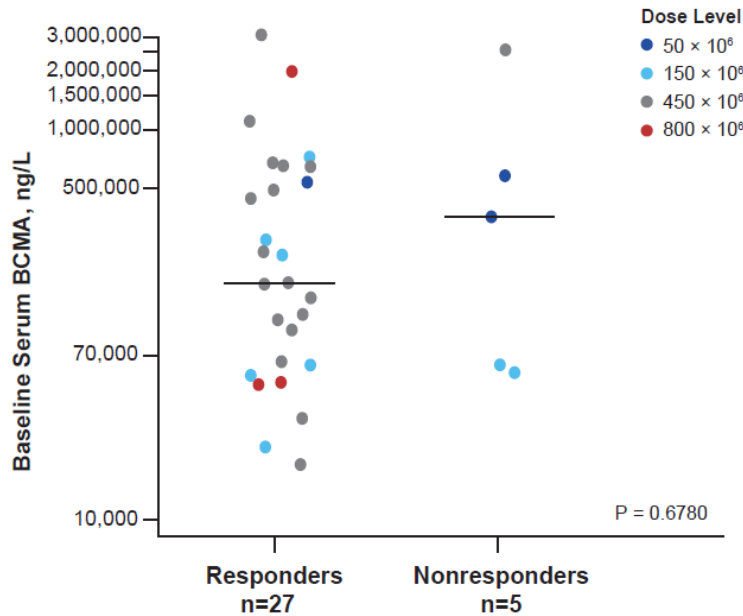

**B. Baseline Tumor BCMA Expression**

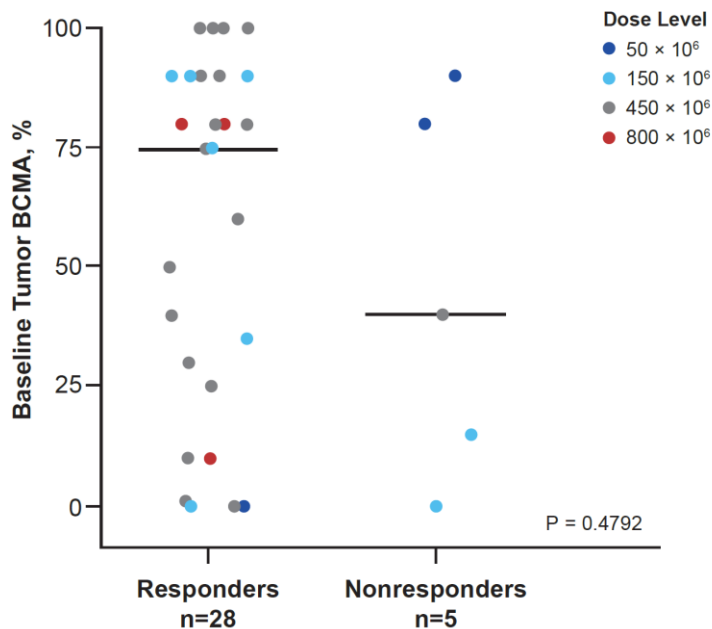

**Figure S8. Changes From Baseline in Serum Monoclonal Protein (A), Free Light Chains (B), and B-Cell Maturation Antigen (C).** Points represent median values and error bars represent interquartile ranges (Q1 and Q3). Involved free light chain (FLC) was analyzed in patients with baseline FLC  $\geq 10$  mg/dL and was defined as the higher value between  $\kappa$ -FLC and  $\lambda$ -FLC at baseline if the ratio was abnormal or by immunofixation if the ratio was normal. For results below detection limits,  $\kappa$ -FLC and  $\lambda$ -FLC were set to 1.3 mg/L and 1.7 mg/L, respectively. Baseline is defined as the last value before start of lymphodepletion. BCMA denotes B-cell maturation antigen.

**A) Serum Monoclonal Protein**

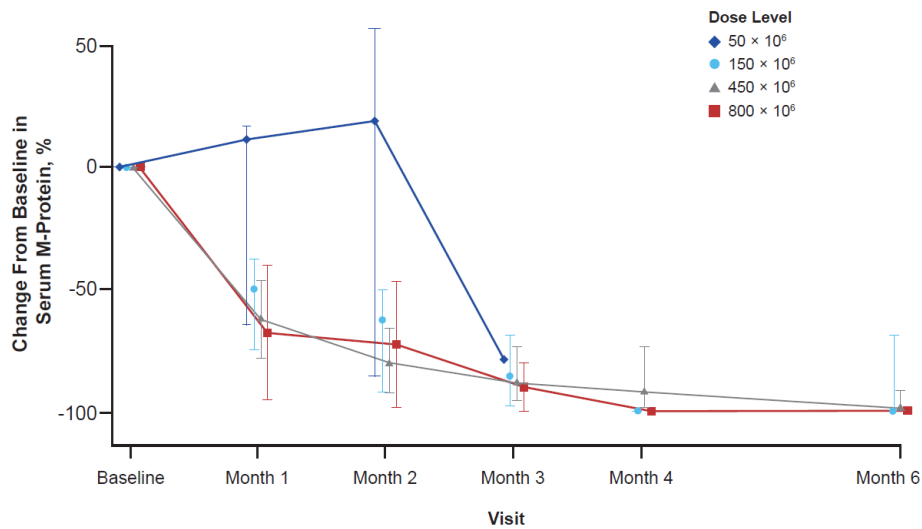

| No. of patients:      |    | Visit |    |    |    |    |  |
|-----------------------|----|-------|----|----|----|----|--|
| 50 x 10 <sup>6</sup>  | 3  | 3     | 3  | 1  | 0  | 0  |  |
| 150 x 10 <sup>6</sup> | 5  | 5     | 5  | 4  | 4  | 4  |  |
| 450 x 10 <sup>6</sup> | 10 | 10    | 10 | 10 | 10 | 10 |  |
| 800 x 10 <sup>6</sup> | 2  | 2     | 2  | 2  | 1  | 2  |  |

**B) Serum Free Light Chain**

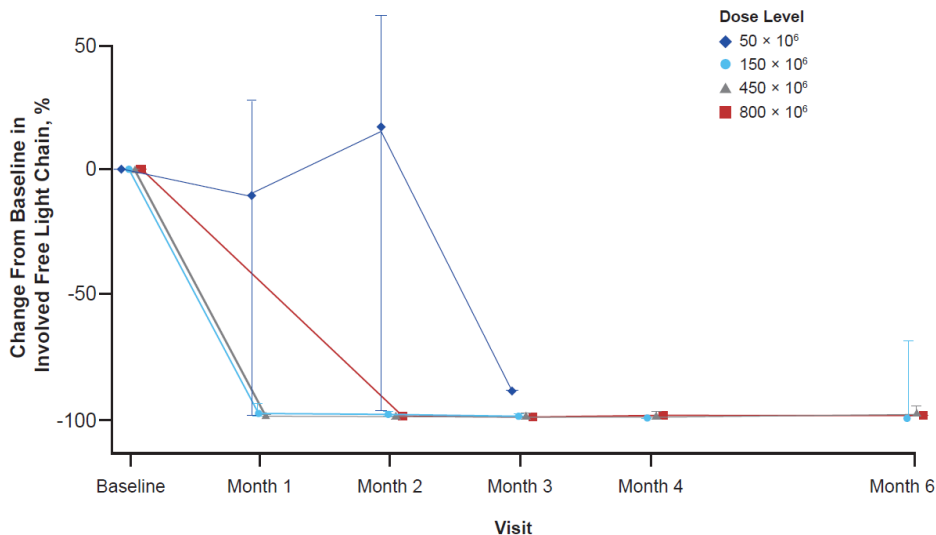

| No. of patients:      |    | Visit |    |    |    |    |  |
|-----------------------|----|-------|----|----|----|----|--|
| 50 x 10 <sup>6</sup>  | 3  | 3     | 3  | 1  | 0  | 0  |  |
| 150 x 10 <sup>6</sup> | 6  | 6     | 5  | 5  | 5  | 5  |  |
| 450 x 10 <sup>6</sup> | 13 | 13    | 12 | 12 | 12 | 10 |  |
| 800 x 10 <sup>6</sup> | 1  | 0     | 1  | 1  | 1  | 1  |  |



### C) Serum B-Cell Maturation Antigen

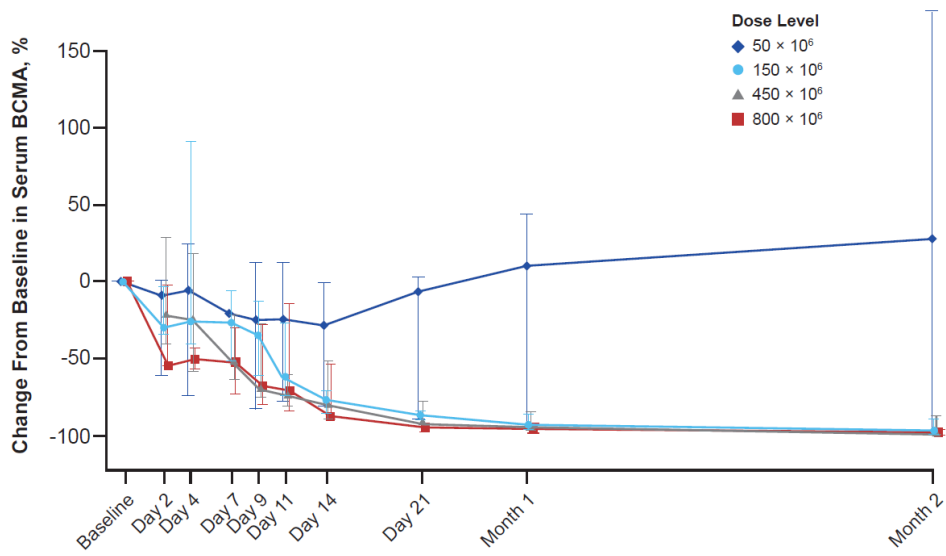

|                         | Visit |    |    |    |    |    |    |    |    |    |
|-------------------------|-------|----|----|----|----|----|----|----|----|----|
| <b>No. of patients:</b> |       |    |    |    |    |    |    |    |    |    |
| 50 × 10 <sup>6</sup>    | 3     | 3  | 3  | 3  | 3  | 3  | 3  | 3  | 3  | 3  |
| 150 × 10 <sup>6</sup>   | 8     | 7  | 7  | 7  | 7  | 7  | 6  | 7  | 7  | 6  |
| 450 × 10 <sup>6</sup>   | 18    | 18 | 18 | 18 | 17 | 17 | 18 | 17 | 18 | 17 |
| 800 × 10 <sup>6</sup>   | 3     | 3  | 2  | 3  | 3  | 3  | 3  | 2  | 3  | 3  |

**Figure S9. Clearance in Bone Marrow by Immunohistochemistry (A) and Tumor Burden Reduction by PET Imaging (B) in Individual Patients.** BCMA denotes B-cell maturation antigen, PET positron emission tomography

**A) Bone Marrow Clearance**

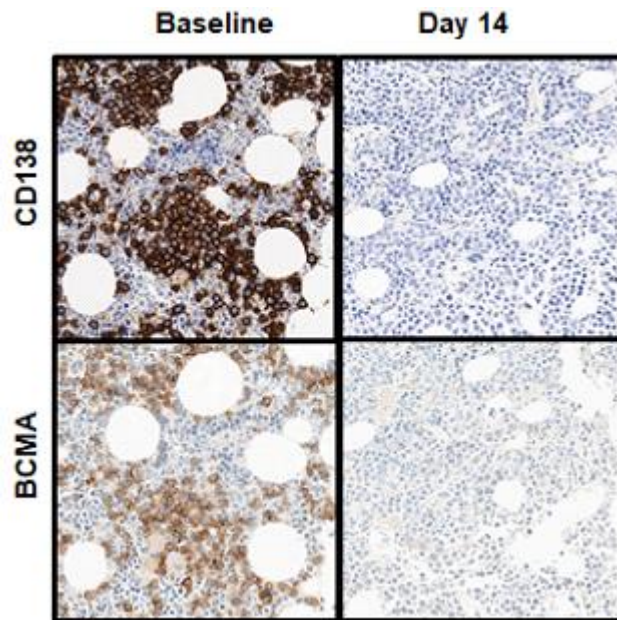

**B) PET Imaging of Patient With Extramedullary Disease**

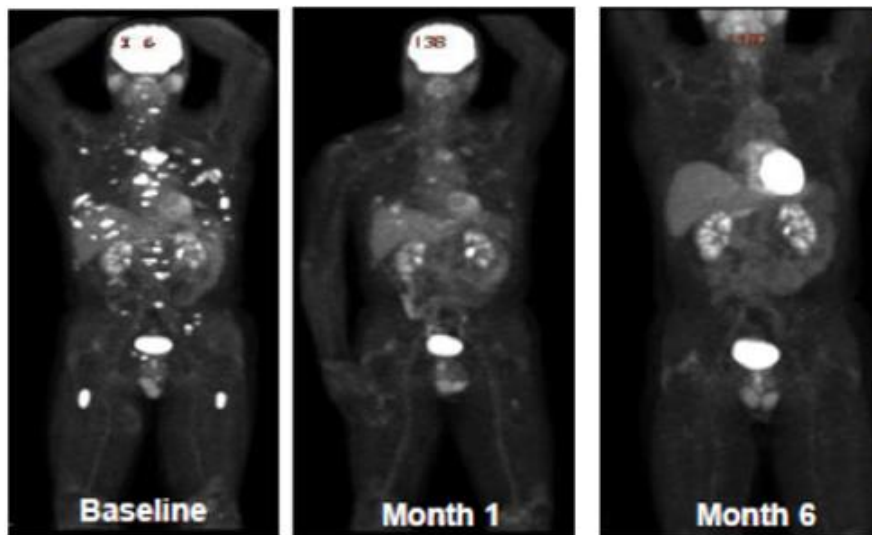

**Figure S10. Correlation Between CAR+ CD4/CD8 T Cell Ratio in the Final Product and at Peak Expansion.** Circles indicate individual patients; 6 patients with a peak CD3+ CAR+ value below the lower limit of quantification (10 cells/uL) were excluded from the analysis. R denotes the Spearman-rank correlation coefficient. The 2-sided P value assesses if the Spearman-rank correlation coefficient is significantly different from 0.

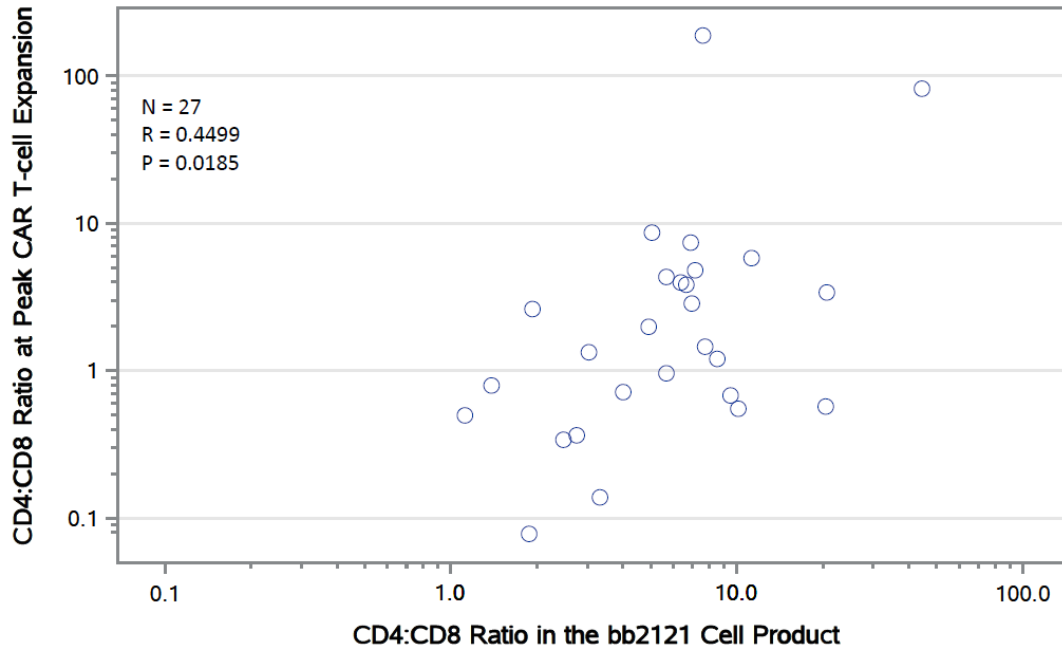

**Figure S11. Vector Transgene Copy  $AUC_{0-28d}$  in Patients With and Without a Response.** All patients (N=33) had  $\geq 1$  month of cellular kinetics data. Horizontal lines indicate the medians. Circles indicate individual patients by dose. P value based on a 2-sided Wilcoxon rank sum test.  $AUC_{0-28d}$  denotes area under the curve during the first 28 days after infusion.

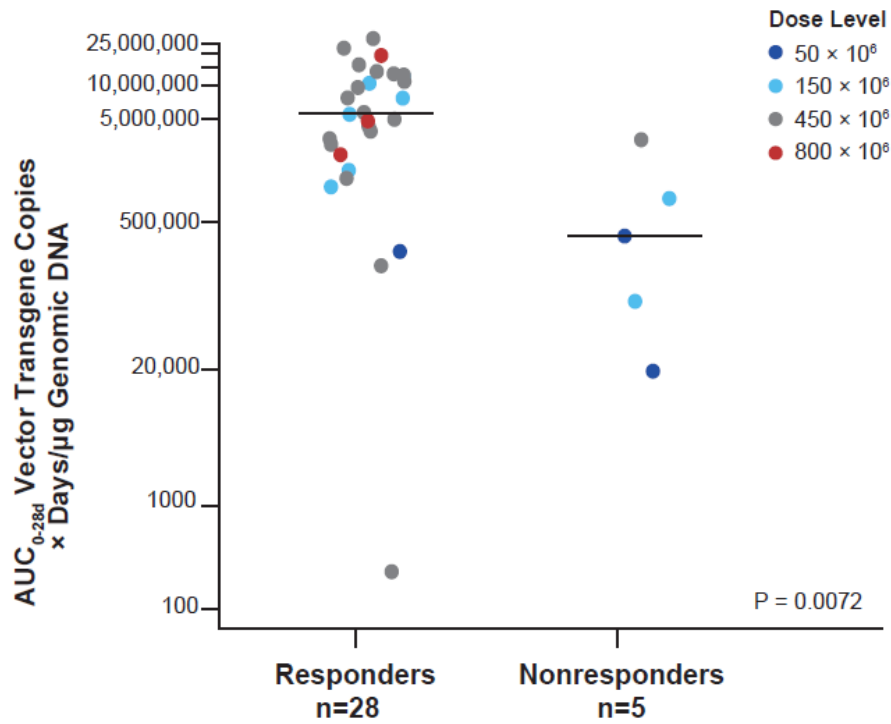

**Table S1. International Myeloma Working Group (IMWG) Uniform Response Criteria<sup>2</sup>**

| <b>Response</b>                  | <b>IMWG Criteria</b>                                                                                                                                                                                                                                                                                                                                                                                                                                                                                                                                                                                                                                                                                                                                                                                                                                                                                                                                                  |
|----------------------------------|-----------------------------------------------------------------------------------------------------------------------------------------------------------------------------------------------------------------------------------------------------------------------------------------------------------------------------------------------------------------------------------------------------------------------------------------------------------------------------------------------------------------------------------------------------------------------------------------------------------------------------------------------------------------------------------------------------------------------------------------------------------------------------------------------------------------------------------------------------------------------------------------------------------------------------------------------------------------------|
| sCR                              | CR, as defined below, plus normal FLC ratio, and absence of clonal plasma cells* by immunohistochemistry or flow cytometry                                                                                                                                                                                                                                                                                                                                                                                                                                                                                                                                                                                                                                                                                                                                                                                                                                            |
| CR                               | Negative immunofixation of serum and urine, and disappearance of any soft tissue plasmacytomas, and <5% plasma cells in bone marrow*<br>In patients in whom the only measurable disease is by serum FLC levels: a normal FLC ratio of 0.26 to 1.65                                                                                                                                                                                                                                                                                                                                                                                                                                                                                                                                                                                                                                                                                                                    |
| VGPR                             | Serum and urine M-protein detectable by immunofixation but not on electrophoresis, or $\geq 90\%$ reduction in serum M-component plus urine M-component level <100 mg/24 hours<br>In patients in whom the only measurable disease is by serum FLC levels: a >90% decrease in the difference between involved and uninvolved FLC levels                                                                                                                                                                                                                                                                                                                                                                                                                                                                                                                                                                                                                                |
| PR                               | $\geq 50\%$ reduction of serum M-protein and reduction in 24 hours urinary M-protein by $\geq 90\%$ or to <200 mg/24 hours<br>If the serum and urine M-protein are unmeasurable, <sup>†</sup> a $\geq 50\%$ decrease in the difference between involved and uninvolved FLC levels is required in place of the M-protein criteria<br>If serum and urine M-protein are not measurable, and serum free light assay is also not measurable, $\geq 50\%$ reduction in bone marrow plasma cells is required in place of M-protein, provided baseline percentage was $\geq 30\%$<br>In addition to the above listed criteria, if present at baseline, a $\geq 50\%$ reduction in the size of soft tissue plasmacytomas is also required                                                                                                                                                                                                                                      |
| MR                               | $\geq 25\%$ but $\leq 49\%$ reduction of serum M-protein and reduction in 24-hour urine M-protein by 50%–89%<br>In addition to the above criteria, if present at baseline, 25%–49% reduction in the size of soft tissue plasmacytomas is also required<br>No increase in size or number of lytic bone lesions (development of compression fracture does not exclude response)                                                                                                                                                                                                                                                                                                                                                                                                                                                                                                                                                                                         |
| No Change / Stable Disease       | Not meeting criteria for CR, VGPR, PR, MR or progressive disease                                                                                                                                                                                                                                                                                                                                                                                                                                                                                                                                                                                                                                                                                                                                                                                                                                                                                                      |
| Progressive Disease <sup>†</sup> | Increase of $\geq 25\%$ from lowest response value in any one or more of the following:<br>Serum M-component (the absolute increase must be $\geq 0.5$ g/dL) <sup>‡</sup> and/or<br>Urine M-component (the absolute increase must be $\geq 200$ mg/24 hour) and/or<br>Only in subjects without measurable serum and urine M-protein levels: the difference between involved and uninvolved FLC levels (the absolute increase must be >10 mg/dL)<br>Only in subjects without measurable serum and urine M-protein levels and without measurable disease by FLC levels: bone marrow plasma cell percentage (the absolute percentage must be $\geq 10\%$ )<br>Definite development of new bone lesions or soft tissue plasmacytomas or definite increase in the size of existing bone lesions or soft tissue plasmacytomas<br>Development of hypercalcemia (corrected serum calcium >11.5 mg/dL) that can be attributed solely to the plasma cell proliferative disorder |
| Relapse                          | Clinical relapse requires one or more of the following direct indicators of increasing disease and/or end organ dysfunction that are considered related to the underlying plasma cell proliferative disorder. <sup>‡</sup><br>1. Development of new soft tissue plasmacytomas or bone lesions<br>2. Definite increase in the size of existing plasmacytomas or bone lesions. A definite increase is defined as a 50% (and at least 1 cm) increase as measured serially by the sum of the products of the cross-diameters of the measurable lesion<br>3. Hypercalcemia (>11.5 mg/dL) [2.875 mmol/L]<br>4. Decrease in hemoglobin of >2 g/dL [1.25 mmol/L] or to <10g/dL                                                                                                                                                                                                                                                                                                |

| Response | IMWG Criteria                                                                            |
|----------|------------------------------------------------------------------------------------------|
|          | 5. Rise in serum creatinine by 2 mg/dL or more [177 µmol/L or more]<br>6. Hyperviscosity |

CR, complete response; CRAB, calcium, renal insufficiency, anemia or bone lesions; DFS, disease-free survival; FLC, free light chain; MR, minor response; PR, partial response; sCR, stringent complete remission; VGPR, very good partial response.

\* Confirmation with repeat bone marrow biopsy not needed.

† All response categories require two consecutive assessments made at any time before classification as relapse or disease progression and/or the institution of any new therapy. In the IMWG criteria, CR subjects must also meet the criteria for progressive disease shown here to be classified as progressive disease for the purposes of calculating time to progression and progression-free survival. The definitions of relapse, clinical relapse and relapse from CR are not to be used in calculation of time to progression or progression-free survival.

‡ For progressive disease, serum M-component increases of  $\geq 1$  gm/dL are sufficient to define relapse if starting M-component is  $\geq 5$  g/dL.

**Table S2. Bridging Therapies Received From Leukapheresis to Lymphodepletion.**

|                            | <b>Total (N=33)</b><br><i>number of patients (percent)</i> |
|----------------------------|------------------------------------------------------------|
| ≥1 bridging therapy*       | 14 (42)                                                    |
| Corticosteroids            |                                                            |
| Dexamethasone              | 12 (36)                                                    |
| Alkylating agents          |                                                            |
| Bendamustine               | 3 (9)                                                      |
| Cyclophosphamide           | 2 (6)                                                      |
| Melphalan                  | 1 (3)                                                      |
| Immunomodulatory agents    |                                                            |
| Lenalidomide               | 1 (3)                                                      |
| Pomalidomide               | 2 (6)                                                      |
| Thalidomide                | 2 (6)                                                      |
| Proteasome inhibitors      |                                                            |
| Bortezomib                 | 3 (9)                                                      |
| Carfilzomib                | 2 (6)                                                      |
| Monoclonal antibodies      |                                                            |
| Daratumumab                | 3 (9)                                                      |
| Other/not classified       |                                                            |
| Bendamustine hydrochloride | 1 (3)                                                      |
| Nelfinavir mesylate        | 1 (3)                                                      |
| Etoposide                  | 1 (3)                                                      |
| Cisplatin                  | 1 (3)                                                      |

\*Patients who received at least one drug as bridging therapy.

**Table S3. Additional Baseline Characteristics of the Safety Population.**

| Characteristic                              | Dose Escalation<br>(N=21) | Expansion<br>(N=12) | Total<br>(N=33) |
|---------------------------------------------|---------------------------|---------------------|-----------------|
| Age                                         |                           |                     |                 |
| Median (min–max)—yr                         | 57 (37–74)                | 64 (46–75)          | 60 (37–75)      |
| Age ≥65 yr—no. (%)                          | 5 (24)                    | 6 (50)              | 11 (33)         |
| Male sex—no. (%)                            | 13 (62)                   | 8 (67)              | 21 (64)         |
| Median (min–max) time since diagnosis—yr*   | 4 (1–16)                  | 6 (1–36)            | 5 (1–36)        |
| High tumor burden—no. (%)†                  | 11 (52)                   | 5 (42)              | 16 (49)         |
| Extramedullary disease—no. (%)              | 4 (19)                    | 5 (42)              | 9 (27)          |
| Tumor BCMA expression ≥50%—no. (%)‡         | 21 (100)                  | 2 (17)              | 23 (70)         |
| Disease stage—no. (%)§                      |                           |                     |                 |
| I                                           | 6 (29)                    | 1 (8)               | 7 (21)          |
| II                                          | 11 (52)                   | 3 (25)              | 14 (42)         |
| III                                         | 4 (19)                    | 4 (33)              | 8 (24)          |
| Unknown                                     | 0                         | 4 (33)              | 4 (12)          |
| ECOG performance-status score—no. (%)       |                           |                     |                 |
| 0                                           | 8 (38)                    | 2 (17)              | 10 (30)         |
| 1                                           | 11 (52)                   | 10 (83)             | 21 (64)         |
| 2                                           | 2 (10)                    | 0                   | 2 (6)           |
| High-risk cytogenetics—no. (%)              | 8 (38)                    | 7 (58)              | 15 (46)         |
| Bridging therapy—no. (%)¶                   | 7 (33)                    | 7 (58)              | 14 (42)         |
| Median (min, max) vein-to-vein time—d       | 34 (33–68)                | 34 (33–62)          | 34 (33–68)      |
| Progression on last line of therapy—no. (%) | 11 (52)                   | 10 (83)             | 21 (64)         |
| No. of prior anti-myeloma regimens—no. (%)  |                           |                     |                 |
| Median (min, max)                           | 7 (3–14)                  | 8 (3–23)            | 7 (3–23)        |
| 3–6                                         | 9 (43)                    | 3 (25)              | 12 (36)         |
| 7–10                                        | 9 (43)                    | 5 (42)              | 14 (42)         |
| >10                                         | 3 (14)                    | 4 (33)              | 7 (21)          |



|                              |                |                   |                |                   |                |                   |
|------------------------------|----------------|-------------------|----------------|-------------------|----------------|-------------------|
| Prior autologous SCT—no. (%) |                |                   |                |                   |                |                   |
| 0                            |                | 0                 |                | 1 (8)             |                | 1 (3)             |
| 1                            |                | 15 (71)           |                | 8 (67)            |                | 23 (70)           |
| ≥2                           |                | 6 (29)            |                | 3 (25)            |                | 9 (27)            |
| Prior therapies—no. (%)      | <b>Exposed</b> | <b>Refractory</b> | <b>Exposed</b> | <b>Refractory</b> | <b>Exposed</b> | <b>Refractory</b> |
| Bortezomib                   | 21 (100)       | 13 (62)           | 12 (100)       | 7 (58)            | 33 (100)       | 20 (61)           |
| Carfilzomib                  | 19 (91)        | 12 (57)           | 11 (92)        | 7 (58)            | 30 (91)        | 19 (58)           |
| Lenalidomide                 | 21 (100)       | 17 (81)           | 12 (100)       | 7 (58)            | 33 (100)       | 24 (73)           |
| Pomalidomide                 | 19 (91)        | 14 (67)           | 12 (100)       | 12 (100)          | 31 (94)        | 26 (79)           |
| Daratumumab                  | 15 (71)        | 9 (43)            | 12 (100)       | 9 (75)            | 27 (82)        | 18 (55)           |
| Bort/Len                     | 21 (100)       | 12 (57)           | 12 (100)       | 5 (42)            | 33 (100)       | 17 (52)           |
| Bort/Len/Car/Pom/Dara        | 15 (71)        | 3 (14)            | 11 (92)        | 3 (25)            | 26 (79)        | 6 (18)            |

BCMA denotes B-cell maturation antigen, Bort bortezomib, Car carfilzomib, Dara daratumumab, ECOG Eastern Cooperative Oncology Group, Len lenalidomide, Pom pomalidomide, SCT stem cell transplant.

\*Time since initial diagnosis to screening.

†Tumor burden was determined by the investigator with high burden defined as ≥50% CD138-positive cells by central laboratory analysis (first preference) or by local analysis of bone marrow plasma cells (second preference). In the absence of both, tumor burden was determined by the Safety Review Committee.

‡Tumor BCMA expression at screening.

§Based on the International Staging System at screening. Four patients in the expansion phase were not available.

||As reported by investigators based on local assessment of screening bone marrow. High-risk includes the following abnormalities: del(17p), t(4;14), or t(14;16).

¶From leukapheresis to lymphodepletion.

**Table S4. Adverse Events Including Symptoms of Cytokine Release Syndrome.**

|                                   | Total (N=33)                        |         |         |
|-----------------------------------|-------------------------------------|---------|---------|
|                                   | Any Grade                           | Grade 3 | Grade 4 |
|                                   | <i>number of patients (percent)</i> |         |         |
| <b>Adverse event*</b>             |                                     |         |         |
| Any                               | 33 (100)                            | 3 (9)   | 28 (85) |
| Hematologic                       |                                     |         |         |
| Neutropenia                       | 30 (91)                             | 1 (3)   | 28 (85) |
| Leukopenia                        | 21 (64)                             | 6 (18)  | 14 (42) |
| Thrombocytopenia                  | 21 (64)                             | 6 (18)  | 12 (36) |
| Anemia                            | 20 (61)                             | 16 (49) | 0       |
| Lymphopenia                       | 7 (21)                              | 4 (12)  | 3 (9)   |
| Gastrointestinal                  |                                     |         |         |
| Nausea                            | 14 (42)                             | 1 (3)   | 0       |
| Vomiting                          | 12 (36)                             | 1 (3)   | 0       |
| Diarrhea                          | 10 (30)                             | 1 (3)   | 0       |
| Constipation                      | 9 (27)                              | 0       | 0       |
| Respiratory                       |                                     |         |         |
| Cough                             | 11 (33)                             | 0       | 0       |
| Nasal congestion                  | 8 (24)                              | 0       | 0       |
| Dyspnea                           | 6 (18)                              | 0       | 0       |
| Epistaxis                         | 6 (18)                              | 1 (3)   | 0       |
| Productive cough                  | 6 (18)                              | 0       | 0       |
| Other                             |                                     |         |         |
| Cytokine release syndrome NOS     | 25 (76)                             | 2 (6)   | 0       |
| Pyrexia                           | 25 (76)                             | 2 (6)   | 0       |
| Fatigue                           | 17 (52)                             | 2 (6)   | 0       |
| Upper respiratory tract infection | 14 (42)                             | 3 (9)   | 0       |
| Headache                          | 13 (39)                             | 1 (3)   | 0       |
| Hypotension                       | 13 (39)                             | 3 (9)   | 0       |
| Chills                            | 12 (36)                             | 0       | 0       |
| Hypocalcemia                      | 11 (33)                             | 1 (3)   | 0       |
| Peripheral edema                  | 10 (30)                             | 1 (3)   | 0       |
| Sinus tachycardia                 | 8 (24)                              | 2 (6)   | 0       |
| Tachycardia                       | 8 (24)                              | 0       | 0       |
| Hypokalemia                       | 8 (24)                              | 0       | 0       |
| Hypophosphatemia                  | 8 (24)                              | 3 (9)   | 0       |
| Dizziness                         | 8 (24)                              | 1 (3)   | 0       |
| Arthralgia                        | 7 (21)                              | 0       | 0       |
| Hypoalbuminemia                   | 7 (21)                              | 0       | 0       |
| Decreased appetite                | 6 (18)                              | 0       | 0       |
| Hyperglycemia                     | 6 (18)                              | 1 (3)   | 0       |
| Back pain                         | 6 (18)                              | 0       | 0       |
| Confusional state                 | 5 (15)                              | 0       | 0       |
| Pain in extremity                 | 5 (15)                              | 0       | 0       |
| Hyponatremia                      | 5 (15)                              | 3 (9)   | 0       |

NOS denotes not otherwise specified.

\*Adverse events, including those designated as symptoms of cytokine release syndrome, that occurred in 15% or more of the safety population. One grade 5 event was reported (cardio-respiratory arrest).

**Table S5. Adverse Events and Cytokine Release Syndrome From Week 8 Through Month 6.**

|                                   | Total (N=31)                        |         |         |
|-----------------------------------|-------------------------------------|---------|---------|
|                                   | Any Grade                           | Grade 3 | Grade 4 |
|                                   | <i>number of patients (percent)</i> |         |         |
| <b>Adverse event*</b>             |                                     |         |         |
| Any                               | 28 (90)                             | 13 (42) | 9 (29)  |
| Hematologic                       |                                     |         |         |
| Neutropenia                       | 17 (55)                             | 8 (26)  | 8 (26)  |
| Leukopenia                        | 12 (39)                             | 5 (16)  | 3 (10)  |
| Thrombocytopenia                  | 12 (39)                             | 2 (7)   | 3 (10)  |
| Anemia                            | 5 (16)                              | 1 (3)   | 0       |
| Gastrointestinal                  |                                     |         |         |
| Nausea                            | 7 (23)                              | 1 (3)   | 0       |
| Diarrhea                          | 4 (13)                              | 1 (3)   | 0       |
| Vomiting                          | 4 (13)                              | 1 (3)   | 0       |
| Other                             |                                     |         |         |
| Upper respiratory tract infection | 8 (26)                              | 2 (7)   | 0       |
| Cough                             | 6 (19)                              | 0       | 0       |
| Fatigue                           | 4 (13)                              | 0       | 0       |
| Pyrexia                           | 4 (13)                              | 0       | 0       |
| <b>Cytokine release syndrome†</b> | 0                                   | 0       | 0       |

\*Adverse events not designated as symptoms of cytokine release syndrome that occurred in 10% or more of the safety population from week 8 through 6 months after infusion. One grade 5 event was reported (cardio-respiratory arrest).

†Clustered term including the preferred term; uniformly graded per Lee DW, et al.<sup>30</sup>

**Table S6. Characteristics and Management of Cytokine Release Syndrome (Safety Population).**

| <b>Parameter</b>                     | <b>Total<br/>(N=33)</b> |
|--------------------------------------|-------------------------|
| Patients with a CRS event—no. (%)    |                         |
| Any-grade                            | 25 (76)                 |
| Grade $\geq 3$                       | 2 (6)                   |
| Median (min–max) time to onset, days |                         |
| Any-grade                            | 2 (1–25)                |
| First grade $\geq 3$                 | 5 (4–6)                 |
| Median (min–max) duration, days      |                         |
| Any-grade                            | 5 (1–32)                |
| Grade $\geq 3$                       | 2 (2–2)                 |
| Tocilizumab use—no. (%)†             | 7 (21)                  |
| Corticosteroid use—no. (%)‡          | 4 (12)                  |

CRS denotes cytokine release syndrome.

\*Uniformly graded per Lee DW, et al.<sup>30</sup>

†The decision to give tocilizumab was at the treating physician’s discretion based on protocol-specified toxicity management guidelines.

‡Steroid doses administered for treatment of CRS included dexamethasone 10 to 20 mg, hydrocortisone 40 mg and methylprednisolone 100 mg.

**Table S7. Adverse Events Considered Symptoms of Cytokine Release Syndrome.**

| Adverse event*                       | Total (N=33)                        |         |         |
|--------------------------------------|-------------------------------------|---------|---------|
|                                      | Any Grade                           | Grade 3 | Grade 4 |
|                                      | <i>number of patients (percent)</i> |         |         |
| Any                                  | 25 (76)                             | 4 (12)  | 1 (3)   |
| Constitutional                       |                                     |         |         |
| Pyrexia                              | 19 (58)                             | 1 (3)   | 0       |
| Chills                               | 5 (15)                              | 0       | 0       |
| Fatigue                              | 3 (9)                               | 1 (3)   | 0       |
| Lethargy                             | 1 (3)                               | 1 (3)   | 0       |
| Weight increased                     | 1 (3)                               | 1 (3)   | 0       |
| Pelvic pain                          | 1 (3)                               | 0       | 0       |
| Noncardiac chest pain                | 1 (3)                               | 0       | 0       |
| Peripheral edema                     | 1 (3)                               | 0       | 0       |
| Cardiovascular                       |                                     |         |         |
| Hypotension                          | 7 (21)                              | 0       | 0       |
| Tachycardia                          | 5 (15)                              | 0       | 0       |
| Sinus tachycardia                    | 1 (3)                               | 0       | 0       |
| Capillary leak syndrome              | 1 (3)                               | 0       | 0       |
| Orthostatic hypotension              | 1 (3)                               | 0       | 0       |
| Neurologic                           |                                     |         |         |
| Headache                             | 5 (15)                              | 1 (3)   | 0       |
| Confusional state                    | 3 (9)                               | 0       | 0       |
| Brain edema                          | 1 (3)                               | 0       | 0       |
| Somnolence                           | 1 (3)                               | 0       | 0       |
| Tremor                               | 1 (3)                               | 0       | 0       |
| Bradyphrenia                         | 1 (3)                               | 0       | 0       |
| Respiratory                          |                                     |         |         |
| Hypoxia                              | 3 (9)                               | 2 (6)   | 0       |
| Tachypnea                            | 1 (3)                               | 0       | 0       |
| Gastrointestinal                     |                                     |         |         |
| Nausea                               | 2 (6)                               | 0       | 0       |
| Vomiting                             | 1 (3)                               | 0       | 0       |
| Abdominal discomfort                 | 1 (3)                               | 0       | 0       |
| Coagulation                          |                                     |         |         |
| Fibrin D dimer increased             | 1 (3)                               | 0       | 0       |
| Hepatic                              |                                     |         |         |
| Aspartate aminotransferase increased | 2 (6)                               | 1 (3)   | 0       |
| Alanine aminotransferase increased   | 2 (6)                               | 0       | 0       |
| Renal                                |                                     |         |         |
| Hypocalcemia                         | 1 (3)                               | 1 (3)   | 0       |
| Hyponatremia                         | 1 (3)                               | 1 (3)   | 0       |
| Hypophosphatemia                     | 1 (3)                               | 0       | 0       |
| Acute kidney injury                  | 1 (3)                               | 0       | 0       |
| Blood creatinine increased           | 1 (3)                               | 0       | 0       |
| Hematologic                          |                                     |         |         |
| Anemia                               | 1 (3)                               | 1 (3)   | 0       |
| Febrile neutropenia                  | 1 (3)                               | 1 (3)   | 0       |
| Thrombocytopenia                     | 1 (3)                               | 0       | 1 (3)   |
| Other                                |                                     |         |         |
| C-reactive protein increased         | 3 (9)                               | 0       | 0       |

|                               |       |   |   |
|-------------------------------|-------|---|---|
| Photophobia                   | 1 (3) | 0 | 0 |
| Cytokine release syndrome NOS | 3 (9) | 0 | 0 |

---

NOS, not otherwise specified.

\*Adverse events designated as symptoms of cytokine release syndrome in the case report form; symptoms were not available for 2 patients. All events occurred during the first 8 weeks; no patients experienced symptoms of cytokine release syndrome during the second reporting period (week 8 through month 6).

**Table S8. Characteristics and Management of Neurotoxicity (Safety Population).**

| <b>Parameter</b>                            | <b>Total<br/>(N=33)</b> |
|---------------------------------------------|-------------------------|
| Patients with an event—no. (%) <sup>*</sup> |                         |
| Any-grade                                   | 14 (42)                 |
| Grade $\geq 3$                              | 1 (3)                   |
| Median (min–max) time to onset, days        |                         |
| Any-grade                                   | 5 (3–11)                |
| First grade $\geq 3$ <sup>†</sup>           | 11 (11–11)              |
| Median (min–max) duration, days             |                         |
| Any-grade                                   | 8 (1–251)               |
| Grade $\geq 3$                              | 22 (12–32)              |
| Corticosteroid use—no. (%) <sup>‡</sup>     | 2 (6)                   |

<sup>\*</sup>Events occurring in the first 90 days and including the following preferred terms: bradyphrenia, brain edema, confusional state, dizziness, hallucination, insomnia, lethargy, memory impairment, neurotoxicity, nystagmus, somnolence, and tremor.

<sup>†</sup>Only one patient reported grade  $\geq 3$  neurotoxicity with onset at day 11.

<sup>‡</sup>Steroid doses used included dexamethasone 10 mg for treatment of grade 1 neurotoxicity and methylprednisolone 1000 mg daily for 3 days followed by a rapid taper to 250, 125 and 60 mg for treatment of the one case of grade 4 neurotoxicity.

**Table S9. Tumor Response by Baseline Characteristics.\***

| Outcome                       | Dara-Exposed      |                   | Dara Last Line†   |                   | Penta-Exposed     |                   | Serum BCMA‡       |                   | Cytogenetic Risk§ |                         | Tumor Burden      |                   | Bridging Therapy  |                   | EMD               |                   | PD on Last Regimen |                   |
|-------------------------------|-------------------|-------------------|-------------------|-------------------|-------------------|-------------------|-------------------|-------------------|-------------------|-------------------------|-------------------|-------------------|-------------------|-------------------|-------------------|-------------------|--------------------|-------------------|
|                               | Yes (N=27)        | No (N=6)          | Yes (N=21)        | No (N=12)         | Yes (N=26)        | No (N=7)          | <Median (N=16)    | ≥Median (N=16)    | High (N=15)       | Not High/Unknown (N=18) | High (N=16)       | Low (N=17)        | Yes (N=14)        | No (N=19)         | Yes (N=9)         | No (N=24)         | Yes (N=21)         | No (N=12)         |
| Objective response¶           |                   |                   |                   |                   |                   |                   |                   |                   |                   |                         |                   |                   |                   |                   |                   |                   |                    |                   |
| No. with response             | 23                | 5                 | 19                | 9                 | 22                | 6                 | 14                | 13                | 11                | 17                      | 12                | 16                | 14                | 14                | 8**               | 20                | 19                 | 9                 |
| Rate—% (95% CI)               | 85 (66.3 to 95.8) | 83 (35.9 to 99.6) | 91 (69.6 to 98.8) | 75 (42.8 to 94.5) | 85 (65.1 to 95.6) | 86 (42.1 to 99.6) | 88 (61.7 to 98.4) | 81 (54.4 to 96.0) | 73 (44.9 to 92.2) | 94 (72.7 to 99.9)       | 75 (47.6 to 92.7) | 94 (71.3 to 99.9) | 100 (76.8 to 100) | 74 (48.8 to 90.9) | 89 (51.8 to 99.7) | 83 (62.6 to 95.3) | 91 (69.6 to 98.8)  | 75 (42.8 to 94.5) |
| Best overall response—no. (%) |                   |                   |                   |                   |                   |                   |                   |                   |                   |                         |                   |                   |                   |                   |                   |                   |                    |                   |
| Stringent complete response   | 11 (41)           | 1 (17)            | 10 (48)           | 2 (17)            | 11 (42)           | 1 (14)            | 6 (38)            | 5 (31)            | 6 (40)            | 6 (33)                  | 7 (44)            | 5 (29)            | 7 (50)            | 5 (26)            | 3 (33)            | 9 (38)            | 10 (48)            | 2 (17)            |
| Complete response             | 2 (7)             | 1 (17)            | 0                 | 3 (25)            | 2 (8)             | 1 (14)            | 2 (13)            | 1 (6)             | 1 (7)             | 2 (11)                  | 0                 | 3 (18)            | 2 (14)            | 1 (5)             | 1 (11)            | 2 (8)             | 1 (5)              | 2 (17)            |
| Very good partial response    | 7 (26)            | 2 (33)            | 6 (29)            | 3 (25)            | 7 (27)            | 2 (29)            | 4 (25)            | 5 (31)            | 3 (20)            | 6 (33)                  | 4 (25)            | 5 (29)            | 4 (29)            | 5 (26)            | 2 (22)            | 7 (29)            | 6 (29)             | 3 (25)            |
| Partial response              | 3 (11)            | 1 (17)            | 3 (14)            | 1 (8)             | 2 (8)             | 2 (29)            | 2 (13)            | 2 (13)            | 1 (7)             | 3 (17)                  | 1 (6)             | 3 (18)            | 1 (7)             | 3 (16)            | 2 (22)            | 2 (8)             | 2 (10)             | 2 (17)            |
| Stable disease                | 3 (11)            | 1 (17)            | 1 (5)             | 3 (25)            | 3 (12)            | 1 (14)            | 1 (6)             | 3 (19)            | 3 (20)            | 1 (6)                   | 4 (25)            | 0                 | 0                 | 4 (21)            | 1 (11)            | 3 (13)            | 2 (10)             | 2 (17)            |
| Progressive disease           | 1 (4)             | 0                 | 1 (5)             | 0                 | 1 (4)             | 0                 | 1 (6)             | 0                 | 1 (7)             | 0                       | 0                 | 1 (6)             | 0                 | 1 (5)             | 0                 | 1 (4)             | 0                  | 1 (8)             |

BCMA denotes B-cell maturation antigen, Dara daratumumab, EMD extramedullary disease, PD progressive disease.

\*Includes confirmed responses assessed based on the International Myeloma Working Group Uniform Response Criteria for Multiple Myeloma (details on the criteria for disease response are provided in the Supplementary Appendix).

†Includes use of daratumumab as part of the last line of myeloma therapy or as bridging therapy.

‡Based on median BCMA levels among all infused patients.

§As reported by investigators based on local assessment of screening bone marrow. High risk is defined as having del(17p), t(4;14), or t(14;16).



||Tumor burden was determined by the investigator with high burden defined as  $\geq 50\%$  CD138-positive cells by central laboratory analysis (first preference) or by local analysis of bone marrow plasma cells (second preference). In the absence of both, tumor burden was determined by the Safety Review Committee.

¶Objective response is defined as attaining a partial response or better.

\*\*Of 9 patients with EMD at baseline, 5 have progressed and 3 of the 5 had progression, at least in part, in sites of EMD.

**Table S10. CAR T Cell Persistence Over Time.**

|                                | <b>Month 1</b> | <b>Month 3</b> | <b>Month 6</b> | <b>Month 12</b> |
|--------------------------------|----------------|----------------|----------------|-----------------|
| No. at risk                    | 24             | 22             | 23             | 10              |
| No. (%) with detectable vector | 23 (96)        | 19 (86)        | 13 (57)        | 2 (20)          |

All 33 patients were included in the analysis. Data from samples with <50 ng total DNA input were excluded.

## REFERENCES

1. Friedman KM, Garrett TE, Evans JW, et al. Effective Targeting of Multiple B-Cell Maturation Antigen-Expressing Hematological Malignancies by Anti-B-Cell Maturation Antigen Chimeric Antigen Receptor T Cells. *Hum Gene Ther* 2018;29:585-601.
2. Rajkumar SV. Treatment of multiple myeloma. *Nat Rev Clin Oncol* 2011;8:479-91.
3. Lee DW, Gardner R, Porter DL, et al. Current concepts in the diagnosis and management of cytokine release syndrome. *Blood* 2014;124:188-95.
